# Supplementary material for: No degeneration found in focal cartilage defects evaluated with dGEMRIC at 12-year follow-up
Source: PubMed Central journal article supplement — Acta Orthop. 2016 Nov 14;88(1):82–9. doi: 10.1080/17453674.2016.1255484 (PMC5251269; doi:10.1080/17453674.2016.1255484), 2016-11-14
Supplement: IORT_A_1255484_SM9640.pdf [file IORT_A_1255484_SM9640.pdf]

## Supplementary data

Table 5. The T1 results for the Pinker article are manually calculated based on the R1 values from the article and the provided formula for conversion from T1 to R1.  $R1 = 1/T1$  in 1/s,  $T1(\text{ms}) = (1/R1) * 1000$

| Article                                                                       | Mean delta R1 | Mean T1 (ms) |
|-------------------------------------------------------------------------------|---------------|--------------|
| Patient population and localization                                           |               |              |
| Pinker et al. 2008                                                            |               |              |
| Patients undergoing matrix-associated autologous chondrocyte transplantations |               |              |
| Deep zone, baseline                                                           | 2.369         | 422          |
| Deep zone, follow-up                                                          | 1.833         | 545          |
| Superficial zone, baseline                                                    | 1.972         | 507          |
| Superficial zone, follow-up                                                   | 1.912         | 523          |
| Reference population                                                          |               |              |
| Deep zone, baseline                                                           | 0.85          | 1176         |
| Deep zone, follow-up                                                          | 0.846         | 1182         |
| Superficial zone, baseline                                                    | 1.168         | 856          |
| Superficial zone, follow-up                                                   | 1.147         | 872          |
| Neuman et al. 2011                                                            |               |              |
| Meniscectomized patients                                                      |               |              |
| Medially                                                                      |               | 363 (±61)    |
| Laterally                                                                     |               | 396 (±48)    |
| Reference population                                                          |               |              |
| Medially                                                                      |               | 428 (±38)    |
| Laterally                                                                     |               | 445 (±41)    |
| Trattnig et al. 2009                                                          |               |              |
| Cartilage repair tissue                                                       |               | 427 (±159)   |
| Reference population                                                          |               | 636 (±181)   |
| Ericsson et al. 2009                                                          |               |              |
| Meniscectomized patients                                                      |               |              |
| Medially                                                                      |               | 374 (±61)    |
| Laterally                                                                     |               | 437 (±59)    |
| Van Tiel et al. 2013                                                          |               |              |
| Early-stage OA patients                                                       |               |              |
| Medially                                                                      |               | 461–491      |
| Laterally                                                                     |               | 475–581      |
| Årøen et al. 2016                                                             |               |              |
| Patients with FCDs: Injured knee                                              |               |              |
| Medially                                                                      |               | 394–440      |
| Laterally                                                                     |               | 374–455      |
| Patients with FCDs: Control knee                                              |               |              |
| Medially                                                                      |               | 404–483      |
| Laterally                                                                     |               | 410–501      |
| Taylor et al. 2009                                                            |               |              |
| Specimens from patients undergoing total knee replacement and cadavers        |               | 244          |

Table 6. The results of a simple t-test, as explained in the text

| Condyle | Sagittal position | Mean T2 (SD) | p-value |
|---------|-------------------|--------------|---------|
| MFC     | A                 | 51 (10)      | < 0.001 |
|         | C                 | 45 (10)      | 0.05    |
|         | P                 | 52 (12)      | < 0.001 |
| LFC     | A                 | 46 (15)      | 0.1     |
|         | C                 | 48 (9)       | 0.001   |
|         | P                 | 51 (14)      | 0.002   |
